# Supplementary material
Source: HighWire-hosted journal article supplement (https://bmjopen.bmj.com/content/7/1/e014498)

**Appendix 3.** Technique for the acquisition of the Eaton stress view radiograph.

The radiographs will be obtained in the PA projection with the hand and stress view of the trapeziometacarpal joint placed over an X-ray cassette (the volar aspect of the hand touching the cassette), with the forearms held about 10 cm apart and pronated approximately 45° in neutral deviation. The participants will be instructed to place the thumbs parallel (nails symmetric without tilt) and to actively press them together (inwards and down) with the metacarpophalangeal (MCP) and interphalangeal (IP) joints touching. The wrists are held in neutral alignment and the elbows flexed to 90° bilaterally with the subject seated. The top of the foam piece is placed under both thumbs and the rest of the foam is used to keep the forearms apart as shown in the images provided in this Appendix. The study coordinator will provide this protocol to the radiographer and assure that the technique is being correctly executed.

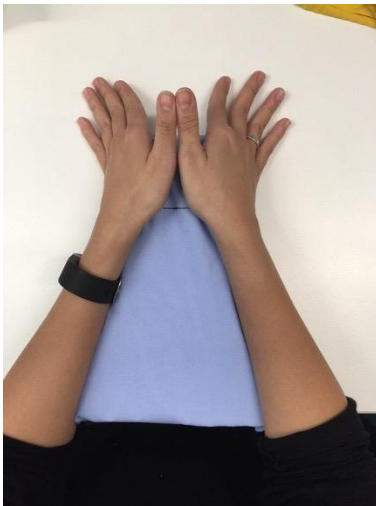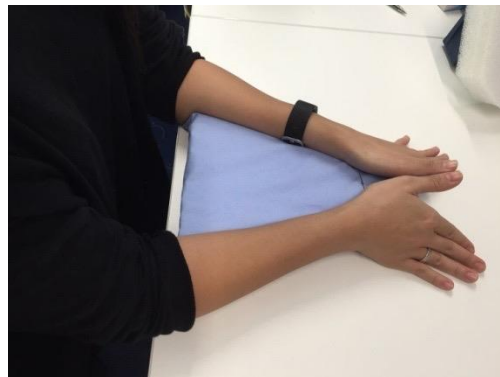

Supplement: inline-supplementary-material-3 [file inline-supplementary-material-3.pdf]
